# Supplementary material for: Helicobacter pylori shows tropism to gastric differentiated pit cells dependent on urea chemotaxis
Source: PubMed Central journal article supplement (PMC9535007; doi:10.1038/s41467-022-33165-4), 2022-10-05
Supplement: 41467_2022_33165_MOESM1_ESM.pdf [file 41467_2022_33165_MOESM1_ESM.pdf]

***Helicobacter pylori* shows tropism to gastric differentiated pit cells  
dependent on urea chemotaxis.**

Carmen Aguilar, Mindaugas Pauzuolis, Malvika Pompaiah, Ehsan Vafadarnejad, Panagiota Arampatzi, Mara Fischer, Dominik Narres, Mastura Neyazi, Özge Kayisoglu, Thomas Sell, Nils Blüthgen, Markus Morkel, Armin Wiegering, Christoph-Thomas Germer, Stefan Kircher, Andreas Rosenwald, Antoine-Emmanuel Saliba, Sina Bartfeld.

**Supplementary Information**

## SUPPLEMENTARY FIGURES

### Supplementary Figure 1

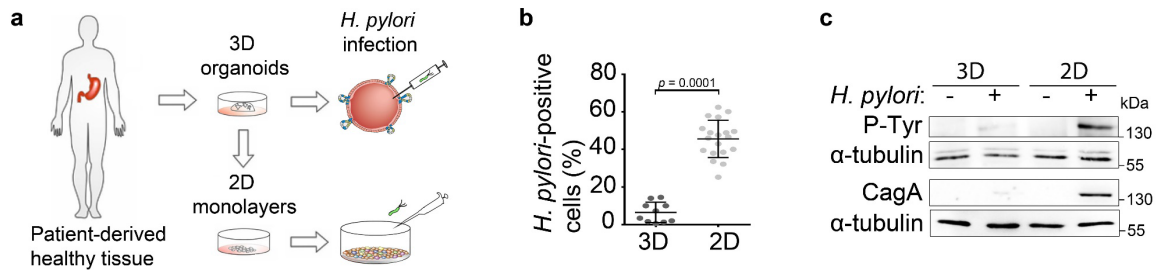

**Supplementary Figure 1. *H. pylori* attaches and translocates CagA into 2D monolayers more efficiently than to 3D organoids.** **a**, Scheme of the experimental setup. 3D organoids were generated from normal gastric tissue from human donors and infected by microinjection with *H. pylori* or used to generate 2D monolayers that were then also infected. **b**, Flow cytometry analysis of *H. pylori* adhesion to 2D monolayers or 3D organoid model. **c**, Western blot for CagA total protein (CagA) and translocated CagA (Phosphorylated CagA, P-Tyr) in *H. pylori*-infected 2D monolayers and 3D organoids. Panel b showing data of organoid lines derived from 3 donors (b) and 3 (3D condition) or 6 (2D condition) independent experiments. Data in panel c showing representative results from data of 3 organoid lines and 1 independent experiment. Results are shown as mean  $\pm$  SD (b). Statistical analysis of data in panel b was performed using a two-tailed Student's t-test. Source data are provided as a Source Data file.

## Supplementary Figure 2

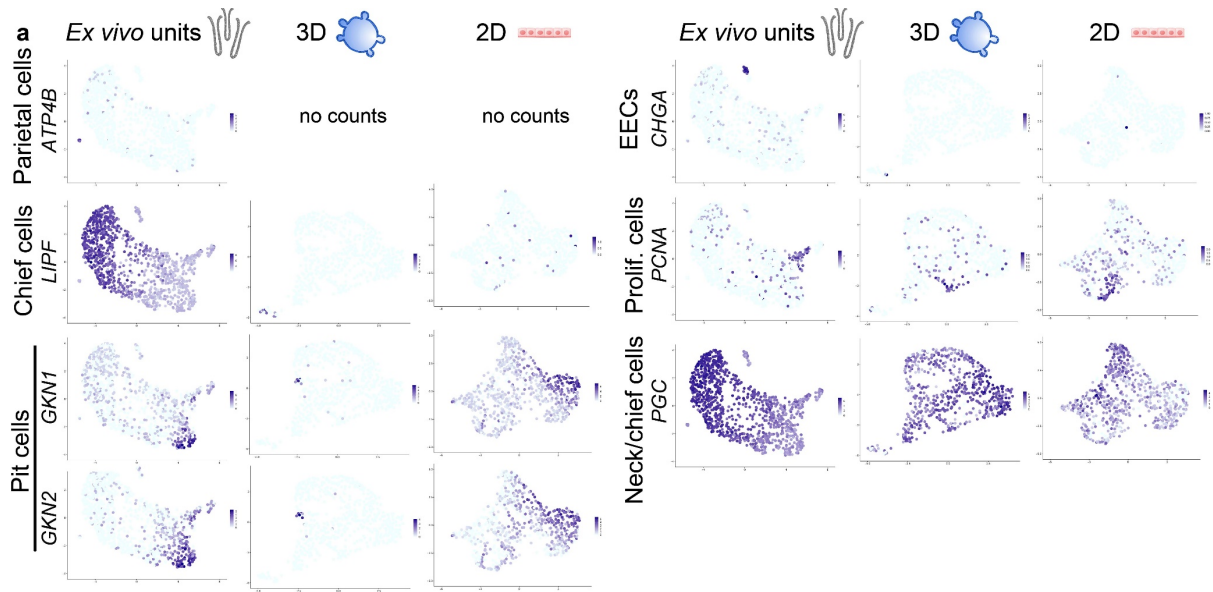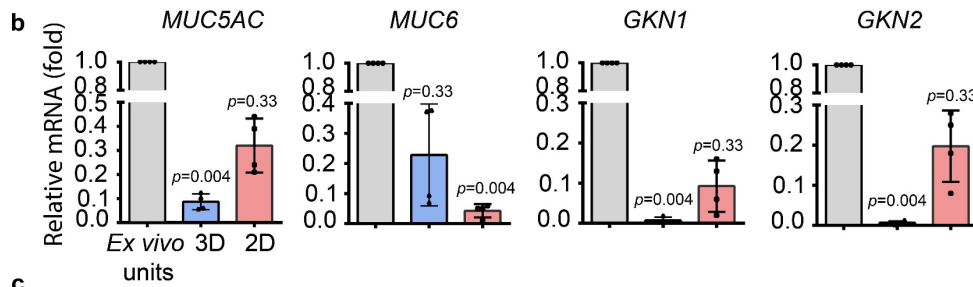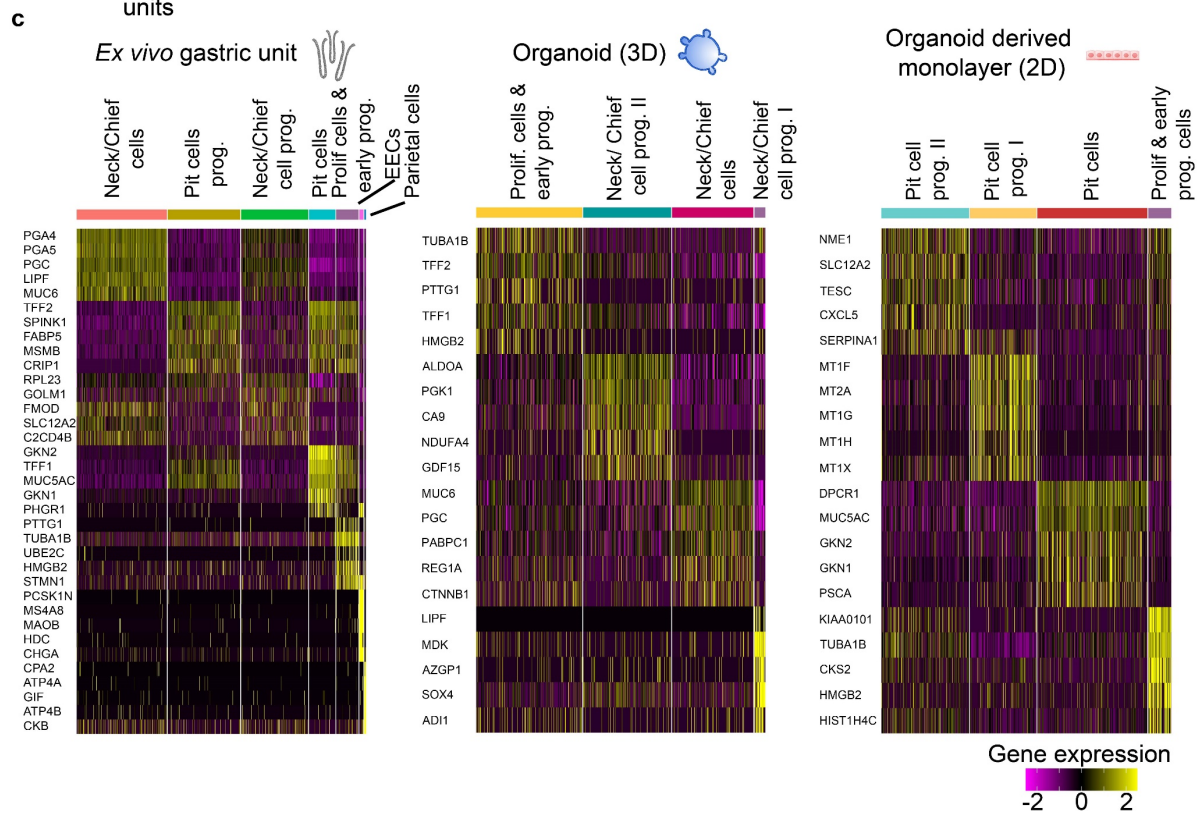

**Supplementary Figure 2. 2D monolayers and 3D organoids are composed of different cell types.** **a**, Expression of known markers specific for the different gastric epithelial cell types colour-coded and projected on top of the UMAPs as in Fig. 1a. **b**, qRT-PCR analysis of *MUC5AC*, *MUC6*, *GKN1* and *GKN2* mRNA in *ex vivo* gastric units, organoids and 2D monolayers. Results are normalized against the *ex vivo* gastric units. **c**, Heatmaps showing differential gene expression of the top 5 genes per cluster in the *ex vivo* gastric unit, 3D organoid and organoid-derived monolayer datasets. Marker genes were identified using Seurat FindAllMarkers function (Wilcoxon Rank-Sum test, min.pct = 0.25, logfc.threshold = 0.25). Results in b are shown as mean  $\pm$  SD of organoids lines generated from 4 donors and 1 independent experiment. Statistical analysis of data in panel b was performed using the Kruskal-Wallis test with Dunn's multiple comparisons test.

### Supplementary Figure 3

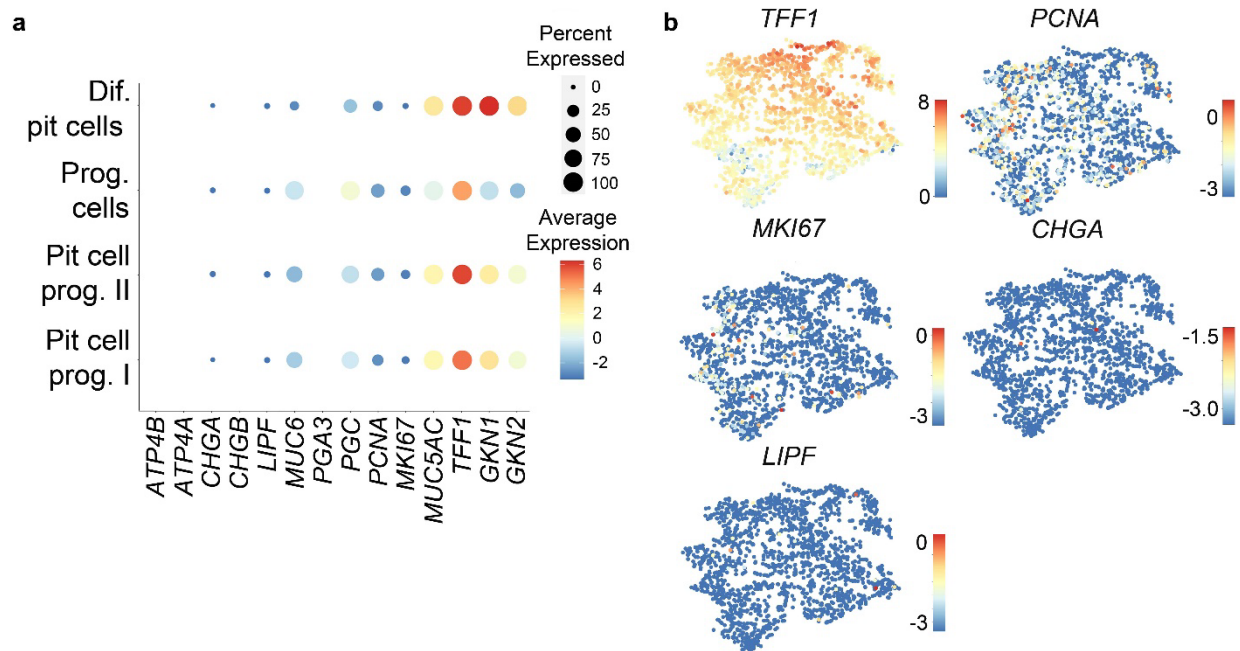

**Supplementary Figure 3. scRNA-seq profiling of *H. pylori* infected 2D monolayers. a**, Dot plot showing the expression of cell type specific marker genes within the clusters. **b**, Expression of known markers specific for the different gastric epithelial cell types, colour-coded and projected on top of the t-SNE as in Fig. 2c.

#### Supplementary Figure 4

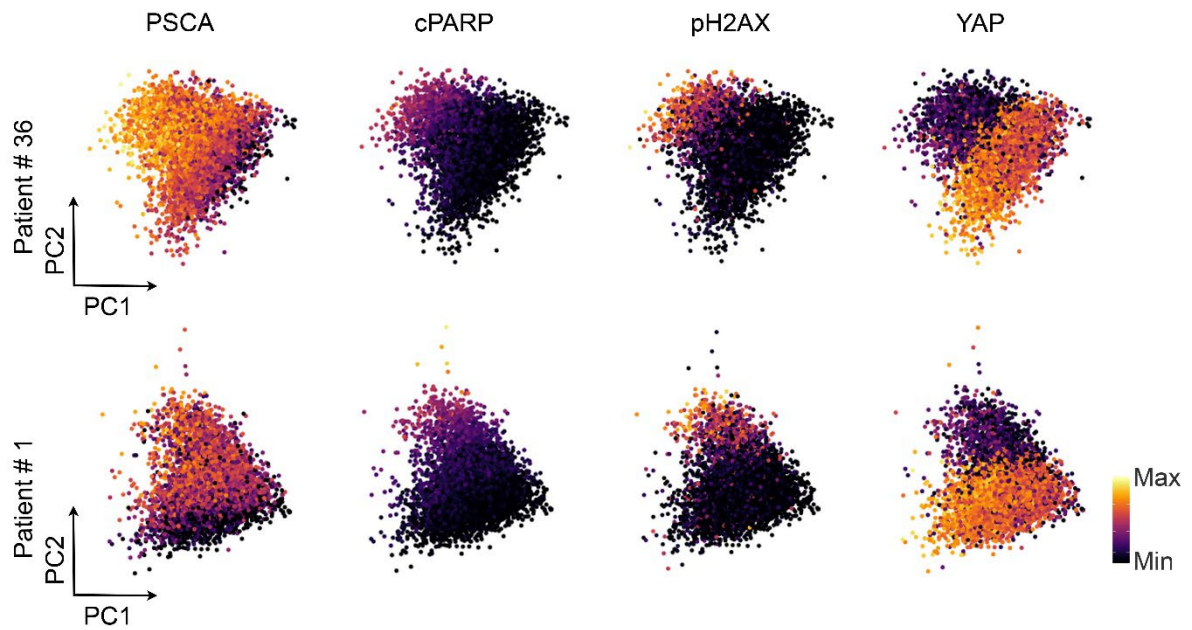

**Supplementary Figure 4. PSCA expression localizes with apoptotic markers.** Protein levels of PSCA, cleaved PARP, phosphorylated H2AX and YAP in 2D naïve monolayers (Patient #36 and #1) measured by mass spectrometry. Every dot represents an individual cell and colours denote intensity of the signal.

### Supplementary Figure 5

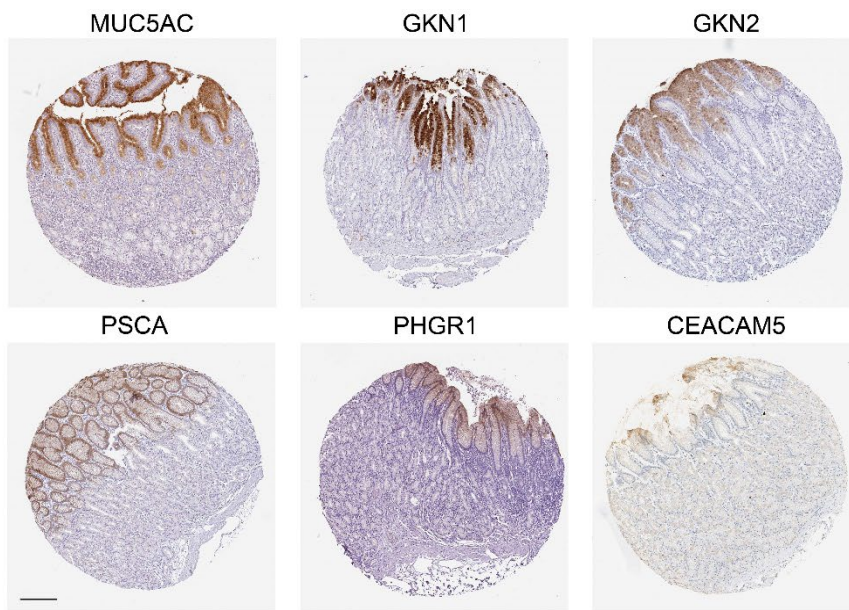

**Supplementary Figure 5. *H. pylori* target cell marker proteins localize to the pit region of gastric units.** Immunohistochemistry analysis of MUC5AC, GKN1, GKN2, PSCA, PHGR1 and CEACAM5 protein expression in human gastric tissue (Data from The Human Protein Atlas Database, See Methods for more detail). Scale bar: 200  $\mu$ m.



## Supplementary Figure 6

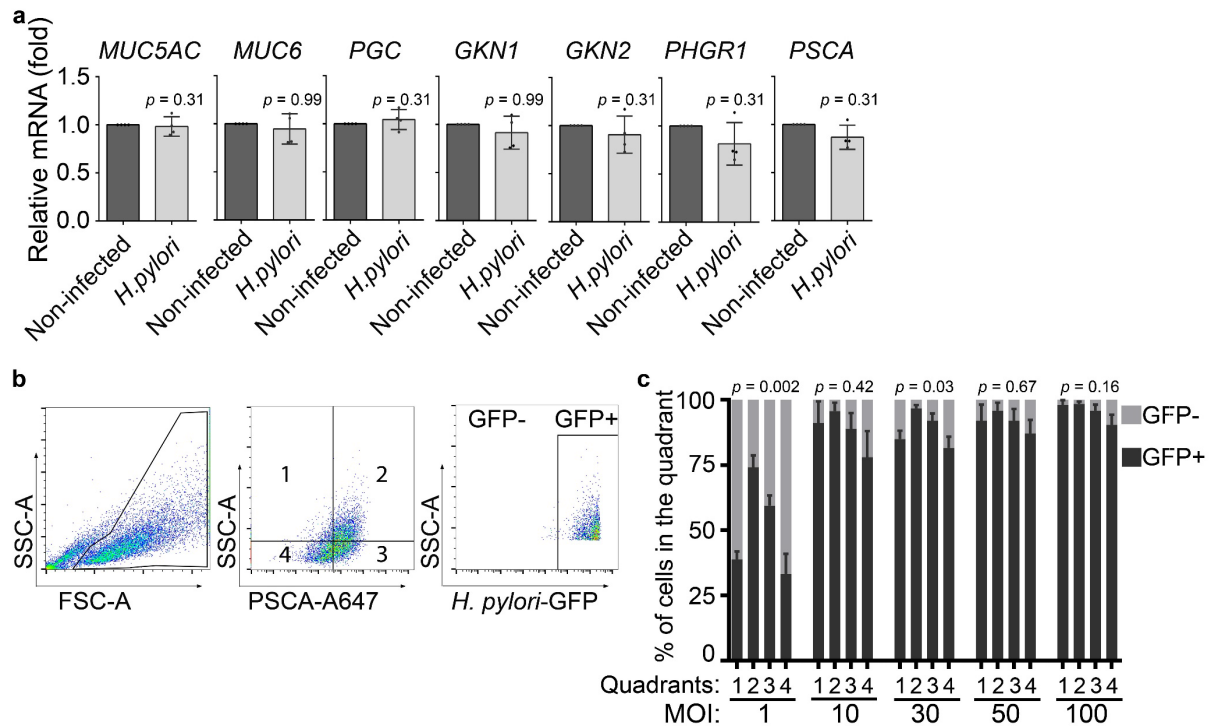

**Supplementary Figure 6. *H. pylori* infection of 2D monolayers do not regulate gene expression of the target cell population markers and *H. pylori* tropism is not observed at high MOIs.** **a**, qRT-PCR analysis of *MUC5AC*, *MUC6*, *PGC*, *GKN1*, *GKN2*, *PHGR1* and *PSCA* mRNA upon infection with *H. pylori*. Results are normalized against control mock-infected. **b**, Representative flow cytometry analysis of *H. pylori*-infected cells and PSCA protein in 2D monolayers. Cells were divided into four quadrants based on size and PSCA signal, and subsequently *H. pylori*-infected cells were quantified in each quadrant. A647: Alexa-Fluor647. **c**, Flow cytometry analysis of *H. pylori*-infected cells per quadrant (as shown in panel b). Results are shown as mean  $\pm$  SD of organoid lines generated from 4 donors (a) and 3 donors (c), and 1 (a) or 3 independent experiments (c). Data in panel b is representative of results from organoid lines from 3 donors. Statistical analysis of data in panel a was performed using two-tailed Student's t-test, and panel c with Kruskal-Wallis test with Dunn's multiple comparisons test.



## Supplementary Figure 7

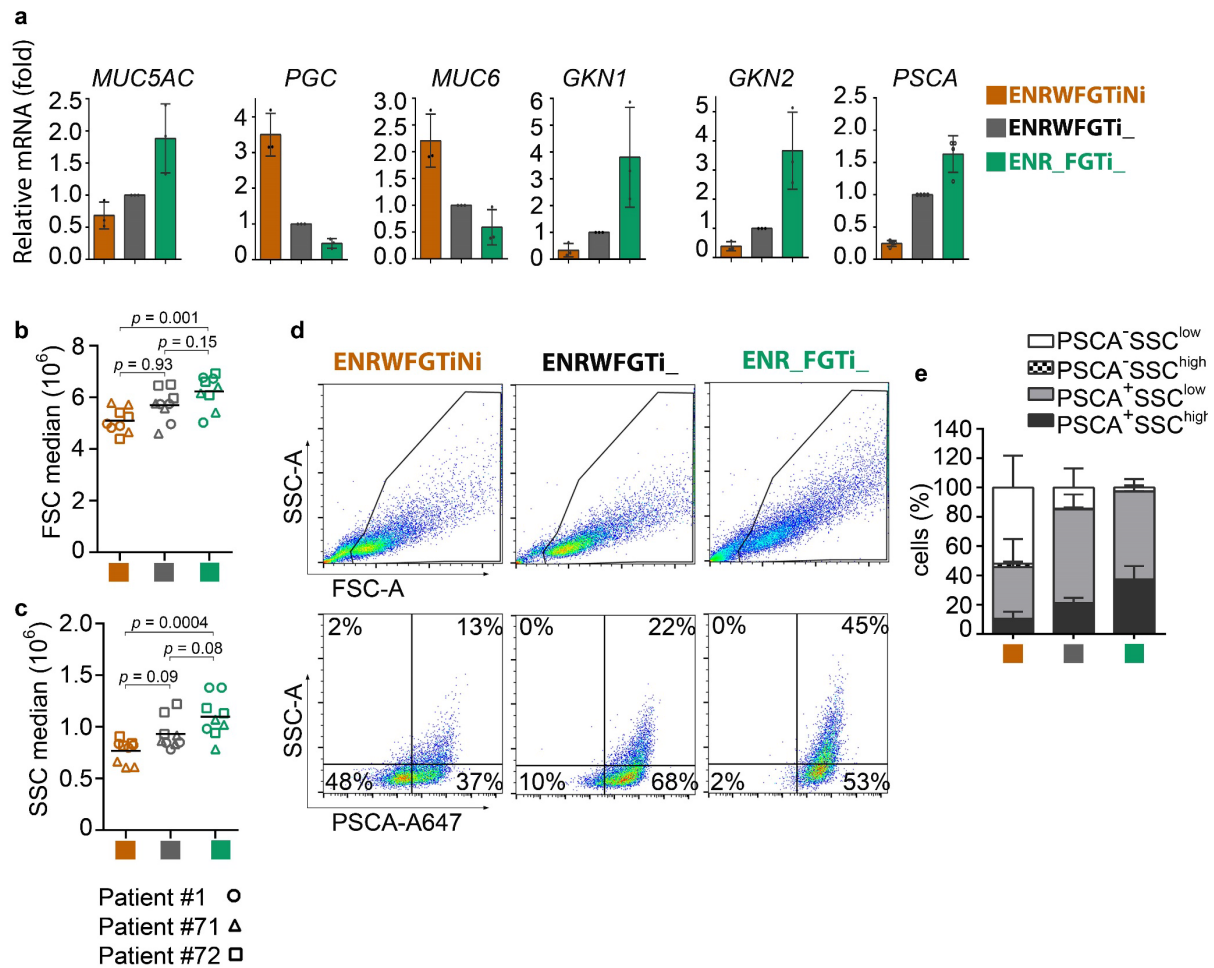

**Supplementary Figure 7. Directed differentiation of 2D monolayers allows enrichment or depletion of differentiated pit cell population.** **a**, qRT-PCR quantification of markers specific for pit cells (*MUC5AC*), neck cells (*MUC6*), chief cells (*PGC*) and the identified markers for differentiated pit cells (*GKN1*, *GKN2* and *PSCA*) in 2D monolayers upon differentiation according to the scheme in Fig. 4a. **b-c**, Median FSC (**b**) and SSC (**c**) values of 2D monolayer cells grown in the different conditions. **d**, Representative flow cytometry analysis of PSCA protein in 2D monolayers grown in the different conditions. A647: Alexa-Fluor647. **e**, Quantification of PSCA protein measured by flow cytometry. Results are shown as mean  $\pm$  SD (a and e) from organoid lines generated from 3 (a) and 4 (e) donors, and 1 (a) or 3 (e) independent experiments. In panel b-c organoid lines from 3 individual donors are shown as symbols (patient #1-circle, #71-triangle, and #72-square), mean values with horizontal lines (3 independent experiments). Data in panel d is representative of results from organoids of 4 donors. Statistical analysis of data in panel a was performed using Kruskal-Wallis test with Dunn's multiple comparisons test, and in panel b-c with one-way ANOVA with Tukey's multiple comparisons test.

## Supplementary Figure 8

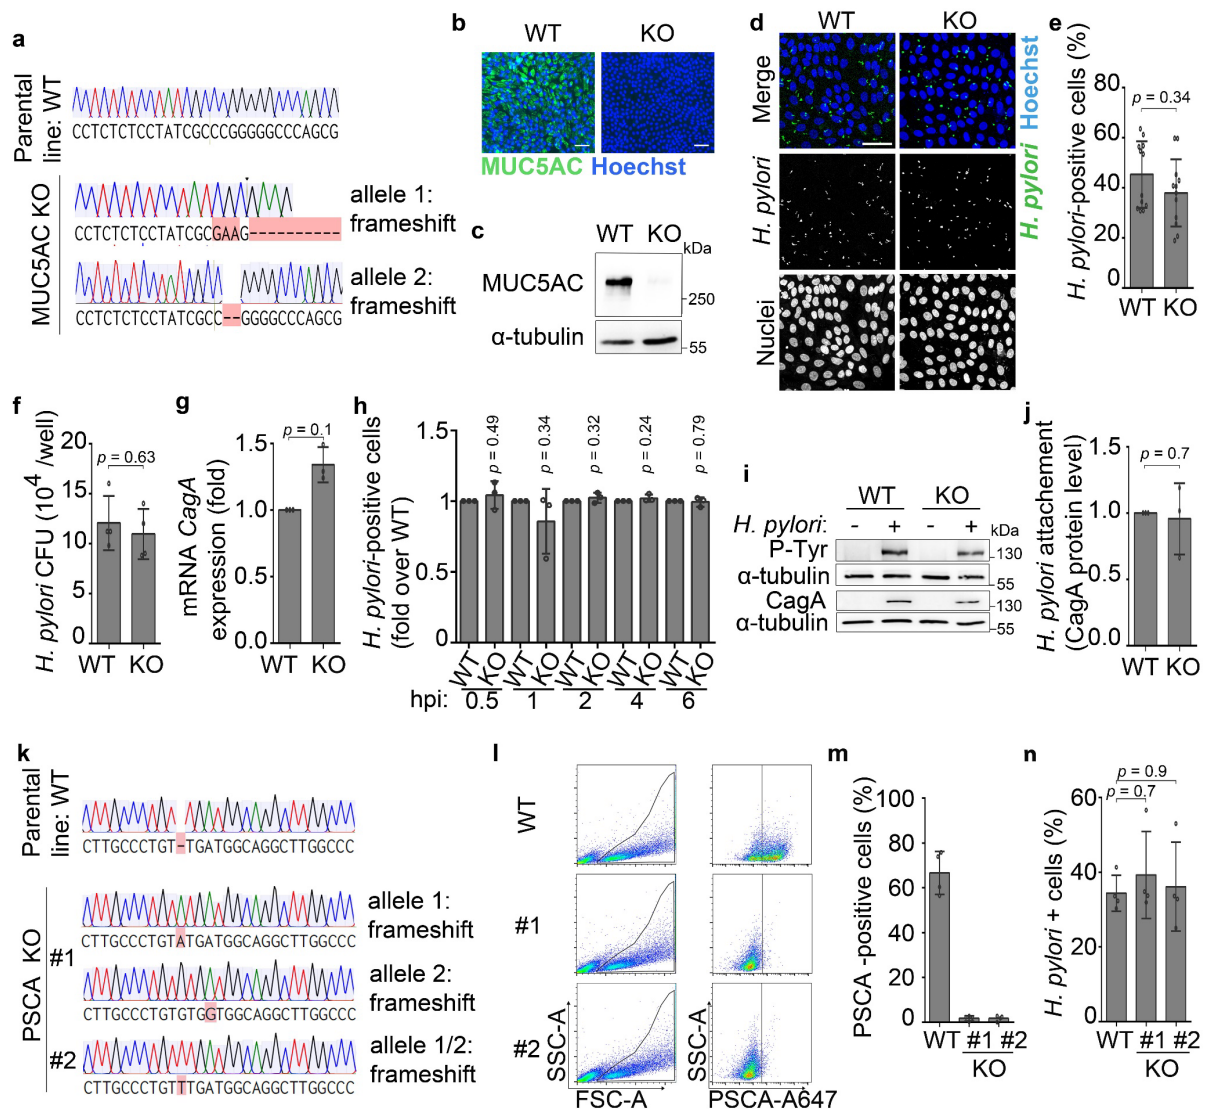

**Supplementary Figure 8. *H. pylori* adhesion is independent of MUC5AC and PSCA expression in organoid-derived monolayers.** **a-c**, Validation of a MUC5AC KO gastric organoid line generated via CRISPR/Cas9 editing: **a**, Sanger sequencing indicates bi-allelic MUC5AC KO. **b-c**, Immunofluorescence (**b**) and western blot (**c**) analysis of MUC5AC parental WT and KO organoid lines. Scale bar: 25  $\mu$ m. **d**, Representative images of parental WT and MUC5AC KO organoid lines infected with GFP-expressing *H. pylori* (green) at MOI 1 for 6 h. Scale bar: 50  $\mu$ m. **e-g**, Quantification of adhered bacteria to the parental WT and MUC5AC KO organoid lines measured by flow cytometry (**e**) CFU assay (**f**) and qRT-PCR of *CagA* (**g**). **h**, Quantification *H. pylori* adhesion to the parental WT and MUC5AC KO organoid-derived monolayers during a time course of 6 hours. **i**, Representative western blot for CagA total protein (CagA) and translocated CagA (phosphorylated CagA, P-Tyr) in the parental WT and MUC5AC KO lines upon infection. **j**, Quantification of bacterial attachment (CagA over host alpha-tubulin) by western blot. Results in **g**, **h**, and **j** were normalized against parental WT. **k-m**, validation of two PSCA KO gastric organoid lines generated via CRISPR/Cas9 editing: **k**, Sanger sequencing shows a frameshift of the coding sequence in both KO lines. **l-m**, representative representation (**l**) and analysis of PSCA levels quantified by flow cytometry (**m**). **n**,

Quantification of adhered bacteria to the parental WT or PSCA KO organoid-derived monolayers. Results are shown as mean  $\pm$  SD of at least 3 independent experiments (panel b-j and l-n). Data in panel d, i and l are representative of results from 3 independent experiments. Statistical analysis of data in panel e-g and j was performed using Two-tailed Student's test, panel h with a multiple t-test corrected for multiple comparisons using the Holm-Sidak method and, in panel m-n with Kruskal-Wallis test with Dunn's multiple comparisons test. Source data are provided as a Source Data file.

## Supplementary Figure 9

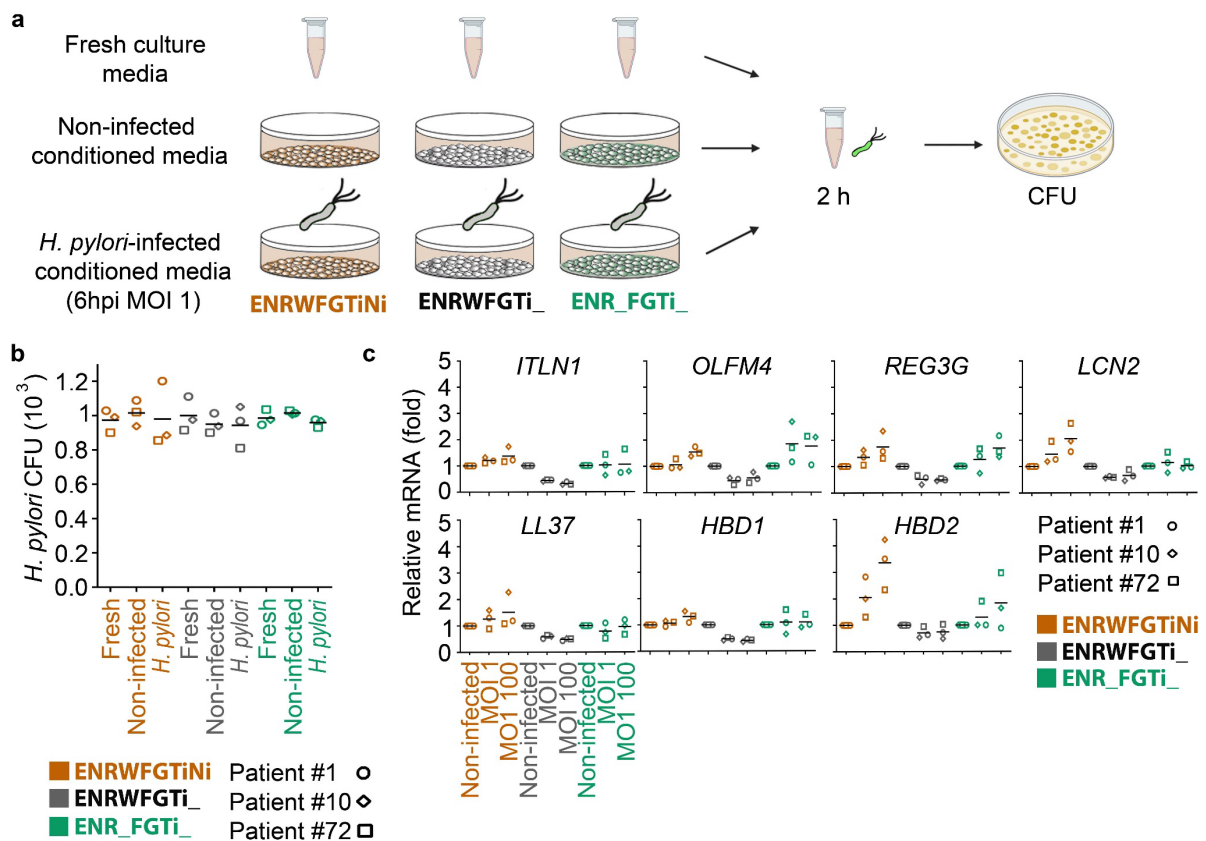

**Supplementary Figure 9. Antimicrobial response of gastric organoid derived-monolayers has no effect on *H. pylori* survival.** **a**, Scheme of the experimental setup. *H. pylori* was incubated with conditioned media from mock- and *H. pylori*-infected cells after 6 hpi for 2 h and then serially plated. Fresh culture media was used as control. **b**, Quantification of bacterial survival after incubation with fresh, non-infected or *H. pylori*-infected cells conditioned media. **c**, qRT-PCR quantification of antimicrobial genes upon infection with *H. pylori*. Data from organoid lines from individual donors are shown as symbols (patient #1-circle, #10-diamond, and #72-square), mean values with horizontal lines. Data in panel b and c is representative of results from 3 independent experiments with organoid lines derived from 3 donors. Statistical analysis of data in panel b was performed using one-way ANOVA with Tukey's multiple comparisons test, and in panel c with Kruskal-Wallis test with Dunn's multiple comparisons test.
